# Supplementary material for: Astragalus polysaccharides (PG2) Enhances the M1 Polarization of Macrophages, Functional Maturation of Dendritic Cells, and T Cell-Mediated Anticancer Immune Responses in Patients with Lung Cancer
Source: Nutrients. 2019 Sep 20;11(10):2264. doi: 10.3390/nu11102264 (PMC6836209; doi:10.3390/nu11102264)
Supplement: Supplementary file 1 [file nutrients-11-02264-s001.pdf]

## SUPPLEMENTARY INFORMATION

### **Astragalus polysaccharides (PG2) enhances the M1 polarization of macrophages, functional maturation of dendritic cells, and T cell-mediated anticancer immune responses in patients with lung cancer**

Oluwaseun Adebayo Bamodu<sup>a,b#</sup>, Kuang-Tai Kuo<sup>c,d#</sup>, Chun-Hua Wang<sup>e,f</sup>, Wen-Chien Huang<sup>g,h</sup>, Alexander T.H. Wu<sup>i</sup>, Jo-Ting Tsai<sup>j,k</sup>, Kang-Yun Lee<sup>l</sup>, Chi-Tai Yeh<sup>c,d,m\*</sup> and Liang-Shun Wang<sup>a,b \*</sup>

<sup>a</sup> Division of Hematology & Oncology, Department of Medicine, Shuang Ho Hospital, Taipei Medical University, New Taipei City, Taiwan.

<sup>b</sup> Department of Medical Research and Education, Shuang Ho Hospital, Taipei Medical University, New Taipei City, Taiwan.

<sup>c</sup> Division of Thoracic Surgery, Department of Surgery, Shuang Ho Hospital, Taipei Medical University, New Taipei City, Taiwan.

<sup>d</sup> Division of Thoracic Surgery, Department of Surgery, School of Medicine, College of Medicine, Taipei Medical University, Taipei, Taiwan.

<sup>e</sup> Department of Dermatology, Taipei Tzu Chi Hospital, Buddhist Tzu Chi Medical Foundation, New Taipei City, Taiwan.

<sup>f</sup> School of Medicine, Buddhist Tzu Chi University, Hualien, Taiwan

<sup>g</sup> MacKay Medical College, Taipei, Taiwan.

<sup>h</sup> Division of Thoracic Surgery, Department of Surgery, MacKay Memorial Hospital, Taipei, Taiwan.

<sup>i</sup> The Ph.D. Program for Translational Medicine, College of Medical Science and Technology, Taipei Medical University, Taipei, Taiwan

<sup>j</sup> Department of Radiation Oncology, Shuang Ho Hospital, Taipei Medical University, New Taipei City, Taiwan.

<sup>k</sup> Department of Radiology, School of Medicine, College of Medicine, Taipei Medical University, Taipei, Taiwan.

<sup>l</sup> Division of Pulmonary Medicine, Department of Internal Medicine, Shuang Ho Hospital, Taipei Medical University, Taiwan.

<sup>m</sup> Department of Biotechnology and Pharmaceutical Technology, Yuanpei University of Medical Technology, Hsinchu City 30015, Taiwan

# These authors contributed equally to this work.

\*Corresponding authors:

Dr. Chi-Tai Yeh

Department of Medical Research and Education, Shuang Ho Hospital, Taipei Medical University New Taipei City 23561, Taiwan; Tel: +886-2-2490088 ext. 8881; Fax: +886-2-2248-0900. E-mail addresses: [ctyeh@s.tmu.edu.tw](mailto:ctyeh@s.tmu.edu.tw)

Dr. Liang-Shun Wang

Division of Thoracic Surgery, Department of Surgery, Shuang Ho Hospital, Taipei Medical University, New Taipei City, Taiwan. Phone: 886-2-2490088 ext. 8885; FAX: 886-2-2248-0900. E-mail: [wangls72269@yahoo.com.tw](mailto:wangls72269@yahoo.com.tw)

**Working title:** PG2 mediates broad spectrum anticancer immunogenicity

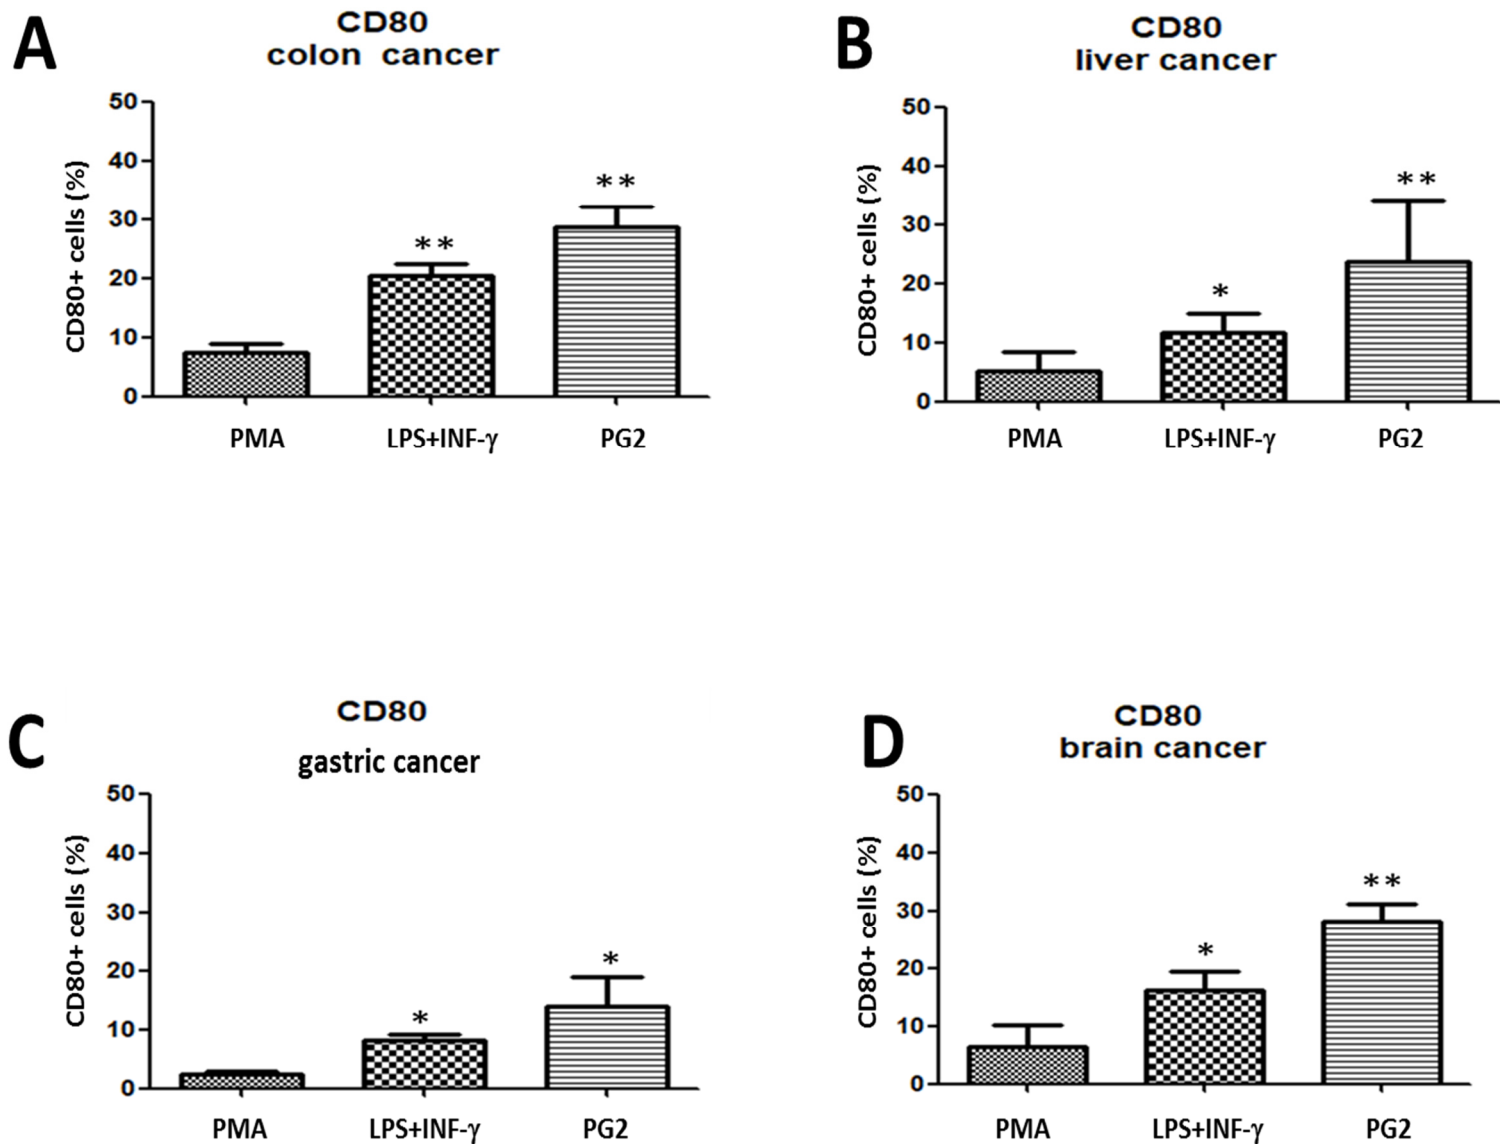

**Supplementary Figure S1.** PG2 enhances the production of CD80+ M1 macrophage-derived DCs from PBMCs of different type of cancer patients.

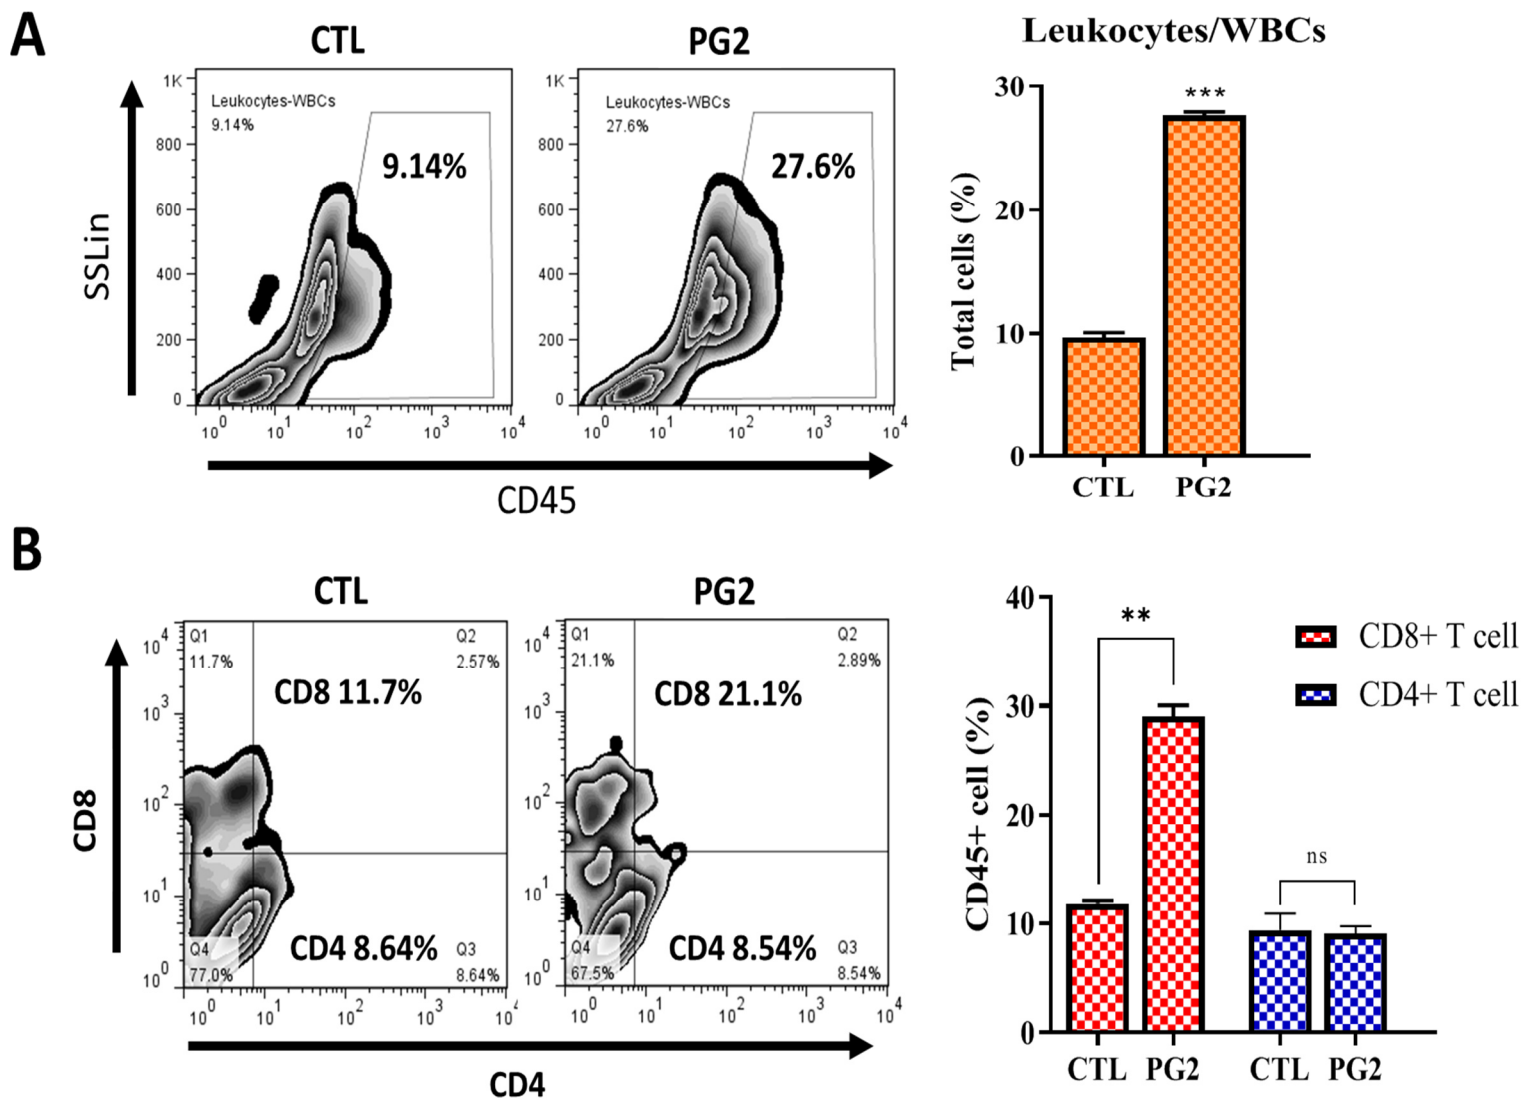

**Supplementary Figure S2.** PG2 treatment elicits significant increase in tumor infiltrating CD8+ T cells population. Representative flow cytometry data (left panel) and histograms (right panel) showing the effect of PG2 on the mean (A) CD45+ leukocyte, and (B) CD8+ or CD4+ T cell population in dissociated patient-derived cell suspensions compared to untreated control tumor samples. \* $p < 0.05$ , \*\* $p < 0.01$ , \*\*\* $p < 0.001$ , ns, not significant.

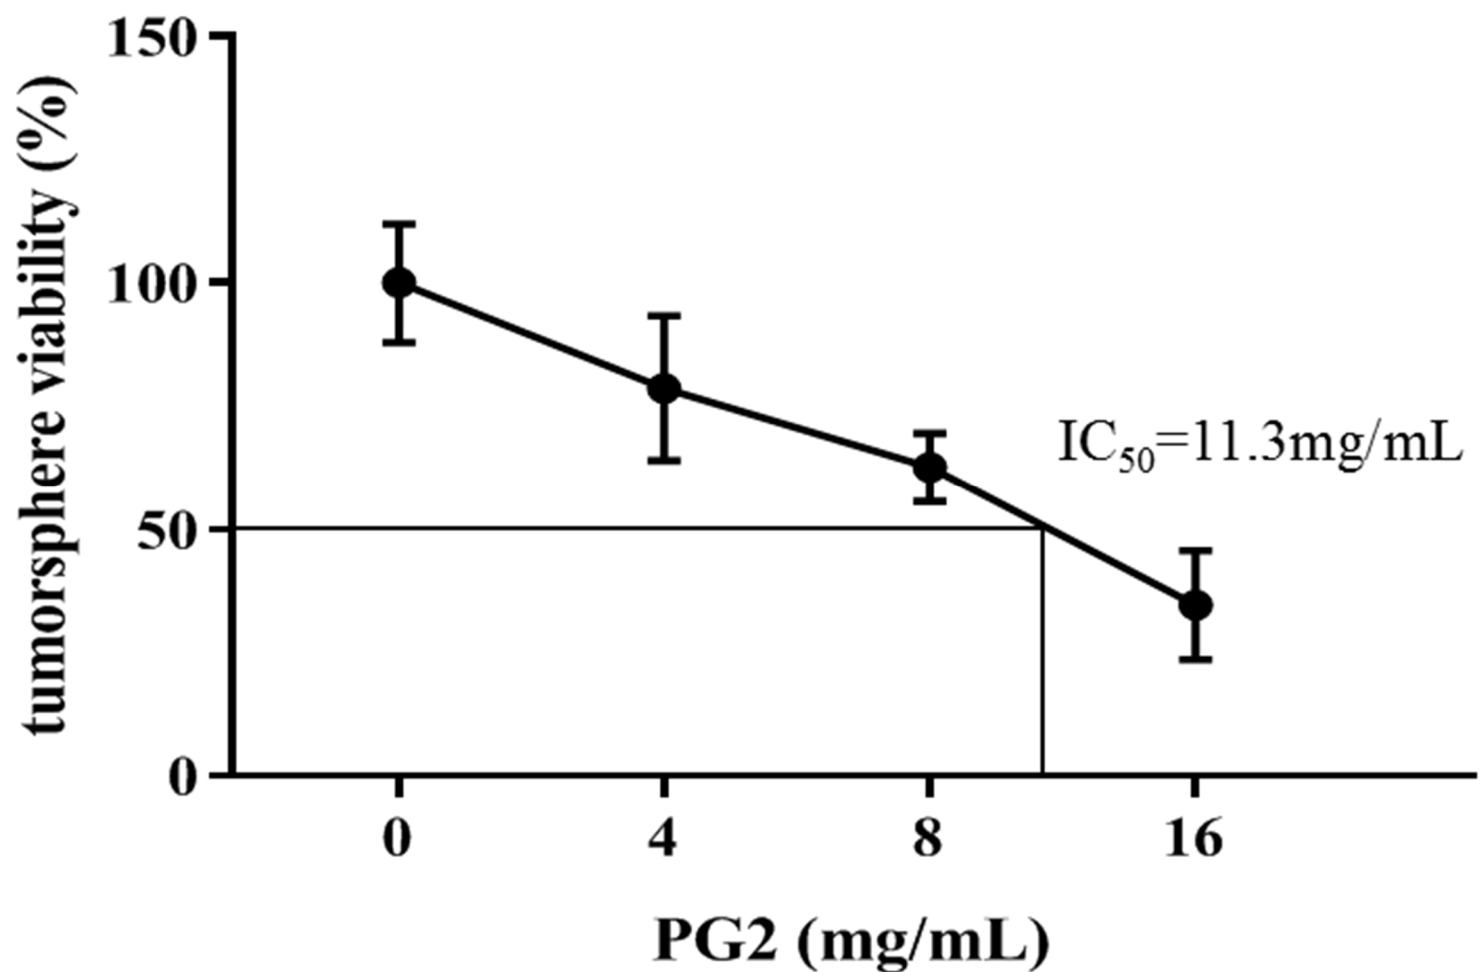

**Supplementary Figure S3.** PG2 suppressed the viability of tumorspheres derived from M2/H1229 co-culture system. Compared to the untreated control, PG2 concentration at the number of tumorspheres formed were reduced by 50% is indicated and used for dichotomization of PG2 dosage as high (16 mg/mL) or low (8 mg/mL).
